# Supplementary material for: Viable RNaseH1 knockout mice show RNaseH1 is essential for R loop processing, mitochondrial and liver function
Source: PubMed Central journal article supplement — Nucleic Acids Res. 2016 Apr 29;44(11):5299–312. doi: 10.1093/nar/gkw350 (PMC4914116; doi:10.1093/nar/gkw350), 2016-04-29

## Supplemental Information

### Supplemental Experimental Procedures

#### Liver Tissue Fractionations

Whole liver cell suspensions were centrifuged at 50 x g. The resulting hepatocyte pellet was washed. Next, the hepatocytes and contaminating miscellaneous cell types were diluted in 5 mL of 50% Percoll (GE Healthcare). The Percoll and cell suspension was then diluted with PBS to a final concentration of 30% and centrifuged at 50 x g for 20 min at 4 °C. A final wash was performed to remove residual Percoll, and cells were subsequently pelleted. The non-parenchymal cell suspension from the original 50 x g hepatocyte supernatant was centrifuged twice more at 50 x g to remove contaminating hepatocytes. The supernatant was then centrifuged at 450 x g to pellet all non-parenchymal cells. The pellet was washed once, and the supernatant was run over a 17.6% (4 mL) and 8.2% (4 mL) OptiPrep™ (Sigma) step gradient. The interface of the gradient (the non-parenchymal cells) was washed with PBS containing 0.5% BSA and 2 mM EDTA and pelleted at 450 x g. Cell concentration and viability were determined for all fractions of interest prior to cell pelleting.

#### Histological evaluation

Liver samples were fixed in 10% buffered formalin (Thermo Fisher Scientific) and embedded into paraffin wax. Multiple adjacent 4-mm sections were cut and mounted on glass slides. After deparaffinization, sections were rehydrated and stained. Hematoxylin and eosin (H&E) staining was performed according to previously published procedures (Freida et al., 2009). For periodic acid solution staining (PAS), slides were incubated in PAS (Sigma) for 5 min and then washed with water three times. Next, slides were placed in Schiff reagent (Sigma) at 4 °C for 18 min and then washed in 0.55% potassium metabisulfite (Sigma) for 1 min prior to a 10 min wash in water.

*Immunohistochemistry* staining, heat-induced epitope retrieval was performed in PT Module buffer (Thermo Fisher Scientific) for 20 min on slides. Prior to blocking in either Rodent Block M (Biocare) or Background Buster (Innovex), slides were washed in TBS (Roche) three times for 2 min each. Slides were then incubated in primary antibody for 1 h at room temperature or overnight

at 4 °C. Antibodies used were anti-Ki-67 (DAKO) diluted 1:200 and anti-COX IV (Abcam) diluted 1:500. Slides were then rinsed with TBS three times for 2 min at each wash. Appropriate secondary antibody with HRP conjugation was added (Jackson Immunoresearch). Slides were then rinsed in three times with TBS for 2 min each rinse. DAB Chromagen (DAKO) was then applied and slides were incubated for 5 min. Slides were rinsed with distilled water and counterstained using a Leica autostainer. Apoptosis was detected using the ApopTag Plus Peroxidase *in situ* Apoptosis Detection Kit (Millipore) using the manufacturer's protocol. For Sirius Red staining, slides were immersed in 0.2% phosphomolybdic acid (Newcomer Supply) for 5 min and then incubated for 90 min at 4 °C with picro-siriusm red (Polysciences) before rinsing in 0.5% acetic acid twice for 2 to 4 min each wash. The slides were then dehydrated in ethanol alcohol 70%, 95%, and 100% for five minutes each, and lastly cleaned in xylene twice for 5 min.

#### List of primer probe set sequences

| Target   | Forward Sequence (5' to 3')     | Reverse Sequence (5' to 3')  | Probe Sequence (5' to 3')                 |
|----------|---------------------------------|------------------------------|-------------------------------------------|
| RNase H1 | CAAACCAGAGGGCCGAGAT             | ACCAGCTTGCTGATGTTCTGA        | FAM - CTGCAAGGCCATCATGCAAGCCATAMRA        |
| Cre      | GCGGTCTGGCAGTAAAACTATC          | GTGAAACAGCATTGCTGTCACTT      | FAM-AAACATGCTTCATCGTCGGTCCGGTAMRA         |
| MTND1    | CTGACCCATAGCCATAATATGATTTATC    | GATTCTCCTTCTGTCAGGTCGAA      | FAM-CAACCCTAGCAGAAACAAACCGGGCTAMRA        |
| MTND2    | AACAAACGGTCTTATCCTTAACATAACA    | TGGGATCCCTTGAGTTACTTCTG      | FAM-CCTATCCATAAACTAGGCCTCGCCCTCA-TAMRA    |
| MTCO1    | CGCCATCATATTCGTAGGAGTAAA        | TCTGAGTAGCGTCGTGGTATTCC      | FAM-CATTCTTCCCTCAACATTTCTGGGCCT-TAMRA     |
| MTCO2    | CCGACTAAATCAAGCAACAGTAACA       | AAATTTTCAGAGCATTGGCCATAG     | FAM-CAAACCGACCAGGGTT-mgbnfq               |
| MTCO3    | GAGACGTAATTCGTGAAGGAACCT        | CCGAGACGATGAATAGATTATACCA    | FAM-CCAAGGCCACCACACTCCTATTGTACA AAA-TAMRA |
| MTATP8   | GCCACAACACTAGATACATCAACATGATT   | TTATGGTTGTTAGTGATTGTTGGTGAAG | FAM-AAGTCTCATCACAAACATTCCCCTGGCA-TAMRA    |
| MTCYTB   | AGACAACACTACATACCAGCTAATCCACTAA | GAATGGCGTATGCAAATAGGAAA      | FAM-CACCCACCCCATATTAAACCCGAACTG-TAMRA     |
| OH(7S_1) | AATCTACCATCCTCCGTGAAACC         | GGCCCCGAGCGAGAAG             | FAM-ACCCGCCACCAATGCCCTAMRA                |

|                   |                         |                            |                                            |
|-------------------|-------------------------|----------------------------|--------------------------------------------|
| CBS (7S_2)        | CCGTCAAGGCATGAAAGGA     | GGGTTTTGCGGACTAAT GATTC    | FAM-AGCACACAGTCTAGACGCACCTAC GG TG-TAMRA   |
| PTEN              | GCCACAGGCTCCCAGACAT     | TCCATCCTCTTGATATCT CCTTTTG | FAM-ACAGCCATCATCAAAGAGATCGTT AGCAGAA-TAMRA |
| TTR               | CGTACTGGAAGACACTTGGCATT | GAGTCGTTGGCTGTGAA AACC     | FAM-CCC GTTCCATGAATTCGCGGATG-TAMRA         |
| $\alpha$ -Actinin | GCACCAACCCCTATAACAACCA  | GGCACTAGCTGCCGTAC ATG      | FAM-CACGCCTCAGGAGATCAATGGCAA-TAMRA         |
| Apo CIII          | CACCGGCTTCTGGGATTCTA    | CAACACAGAAGTCTCAC GACTCAA  | FAM-CCCTGAGGACCAACCAACTCCAGCT -TAMRA       |
| Factor VII        | AATGAGGAACAGTGCTCCTTTGA | TGTAAACAATCCAGAAC TGCTTGGT | FAM-CCC GGGAGATCTTCAAGAGCCC-TAMRA          |
| Neat1             | TCTGGGAGCATCATTCTTTGC   | CCTTACCCCATGAAA AAGG       | FAM-ATGCATGAATGGCAGCAGGCA-TAMRA            |
| Malat1            | TGGGTTAGAGAAGGCGTGTACTG | TCAGCGGCAACTGGGAA A        | FAM-CGTTGGCAGCAGCCTTCAGGGACT -TAMRA        |
| SRB1              | TGACAACGACACCGTGTCTT    | ATGCGACTTGTGAGGCT GG       | FAM-CGTGGAGAACCGCAGCCTCCATT-TAMRA          |

**List of ASO sequences and chemistries**

| Target                | Design            | Sequence (5'-3')                                                                |
|-----------------------|-------------------|---------------------------------------------------------------------------------|
| PTEN ss-siRNA         | 5'-VinylP-ssRNA   | $T_s U_s A_s U_s C_s U_s A_s U_s A_s U_s G_s A_s U_s C_s A_s G_s G_s U_s A_s A$ |
| TTR ASO               | 5-10-5 MOE gapmer | $T_s A_s C_s A_s A_s A_s T_s G_s G_s G_s A_s T_s G_s C_s T_s A_s C_s T_s G_s C$ |
| $\alpha$ -Actinin ASO | 5-10-5 MOE gapmer | $G_s C_s C_s A_s T_s A_s T_s C_s A_s T_s A_s A_s C_s C_s C_s A_s A_s G_s C$     |
| Apo CIII ASO          | 5-10-5 MOE gapmer | $C_s A_s G_s C_s T_s T_s T_s A_s T_s T_s A_s G_s G_s G_s A_s C_s A_s G_s C_s A$ |
| Factor VII ASO        | 5-10-5 MOE gapmer | $G_s A_s C_s C_s C_s T_s G_s G_s T_s G_s T_s A_s C_s A_s C_s C_s C_s A_s A$     |
| Neat1 ASO             | 5-10-5 MOE gapmer | $A_s T_s T_s A_s G_s A_s T_s A_s C_s G_s G_s C_s A_s T_s C_s T_s A_s C_s C_s A$ |
| Malat 1 ASO           | 5-10-5 MOE gapmer | $C_s G_s G_s T_s G_s C_s A_s A_s G_s G_s C_s T_s T_s A_s G_s G_s A_s A_s T_s T$ |
| PTEN ASO              | 5-10-5 MOE gapmer | $C_s T_s G_s C_s T_s A_s G_s C_s C_s T_s C_s T_s G_s G_s A_s T_s T_s G_s A$     |
| SRB1 ASO              | 2-10-2 cEt gapmer | $T_s C_s A_s G_s T_s C_s A_s T_s G_s A_s C_s T_s T_s C$                         |

2'F, 2'OMe, s = PS, o = PO, 2'-O-MOE, 2'-O-cEt, T = 5'-(E)-VinylP-2'-O-MOE T

**Supplemental Reference**

Freida L. Carson, Christa Hladik. (2009) *Histotechnology: A Self-Instructional*

**Figure S1, related to Figure 2 and 4. Histological evaluation of the livers from RNase H1 knockout mice.** Liver tissue was harvested from (1, 2) control *RNase H1* floxed mice (flox + tamoxifen) and inducible *RNase H1* knockout mice (iKO + tamoxifen) 1 week post tamoxifen treatment and (3-8) control *RNase H1* floxed mice (flox) and constitutive *RNase H1* knockout mice (cKO) at weeks 6, 14 and 26 (3-8). Liver sections were stained with: (A) hematoxylin and eosin (H&E) The arrow indicates apoptotic cell ; (B) periodic acid-Schiff (PAS) for glycogen; (C) Ki-67 antibody a, nuclear marker for proliferation; (D) COX IV antibody; (E) terminal deoxynucleotidyl transferase (TUNEL) assay; (F) collagen/connective tissue stain Sirius red. See also Figure 2 and 4.

Figure S1A. Related to Figure 2 and 4

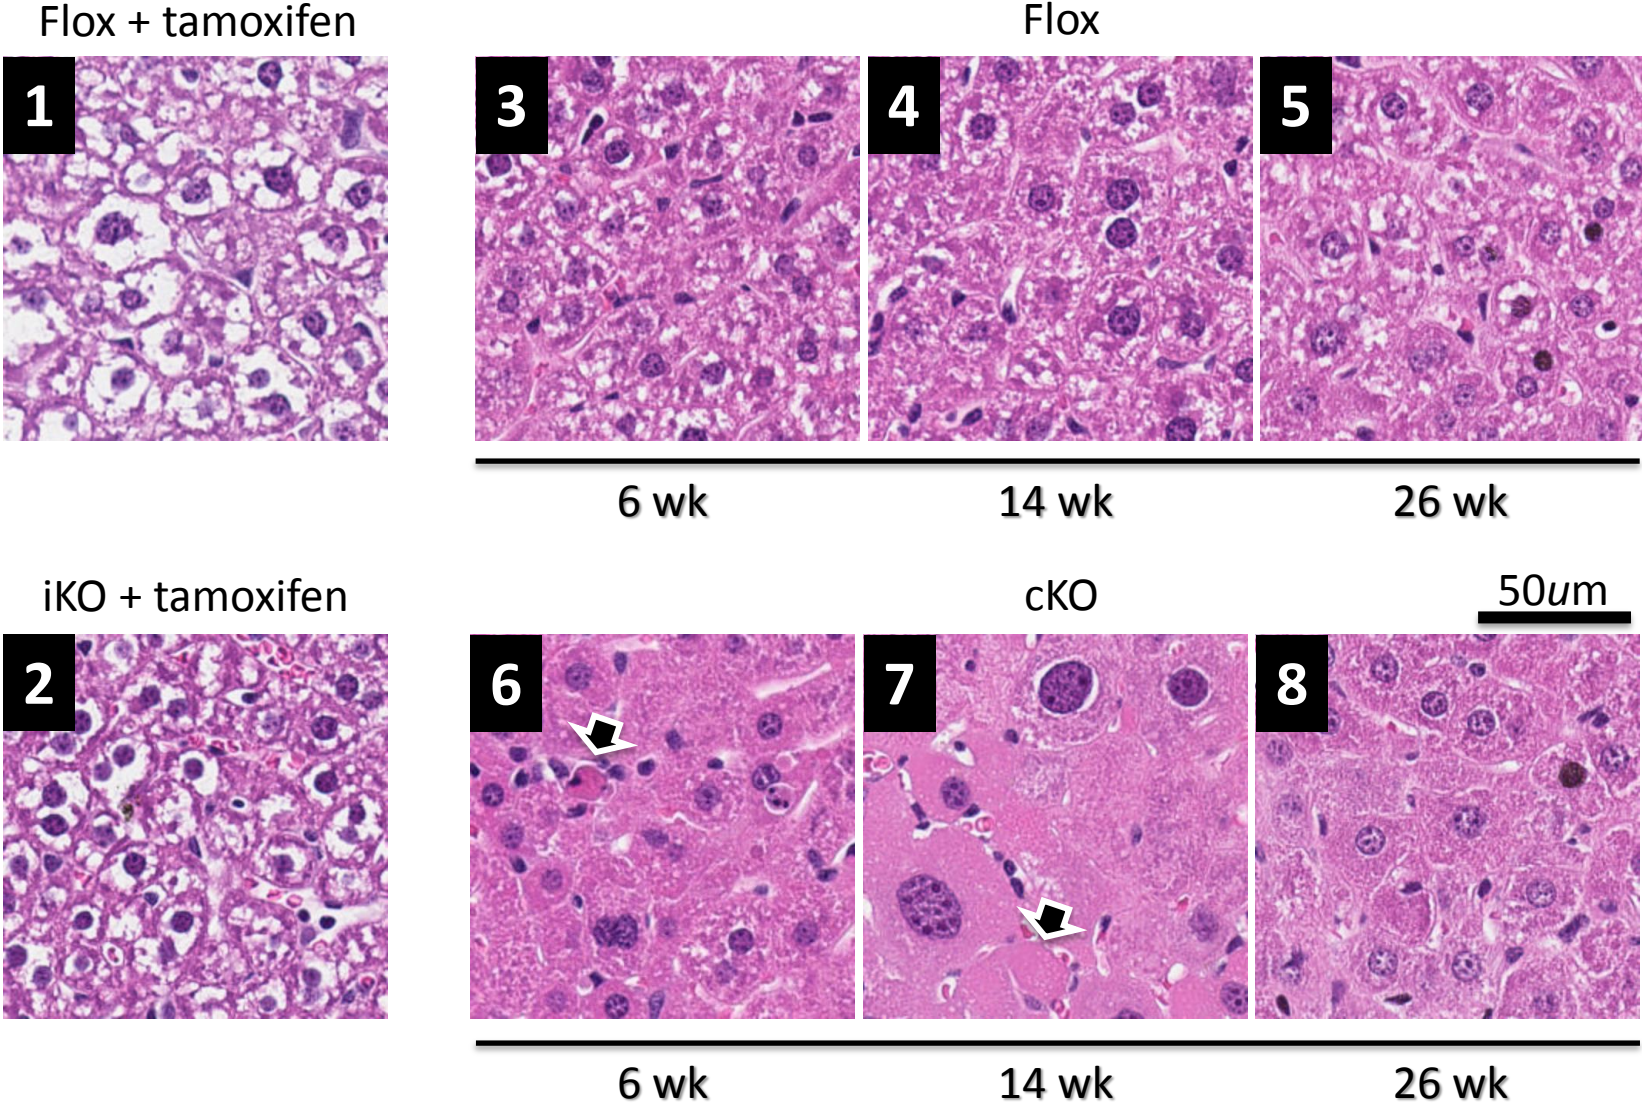

Figure S1B. Related to Figure 2 and 4

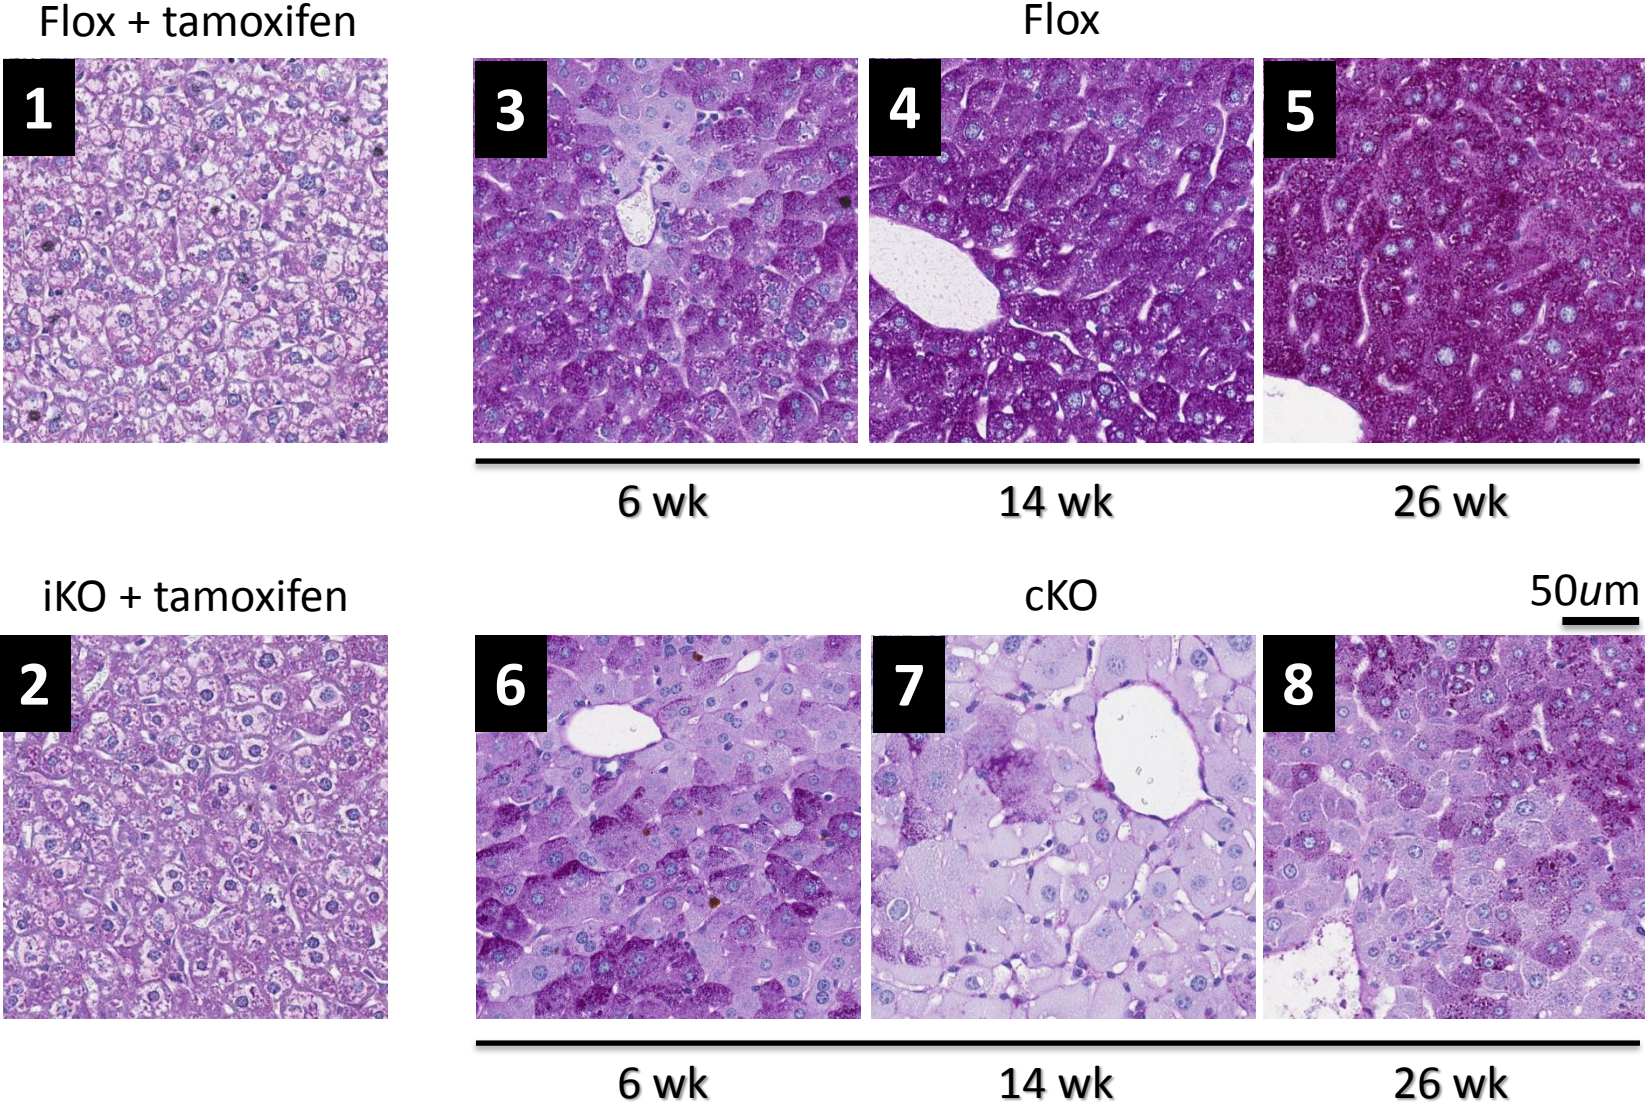

Figure S1C. Related to Figure 2 and 4

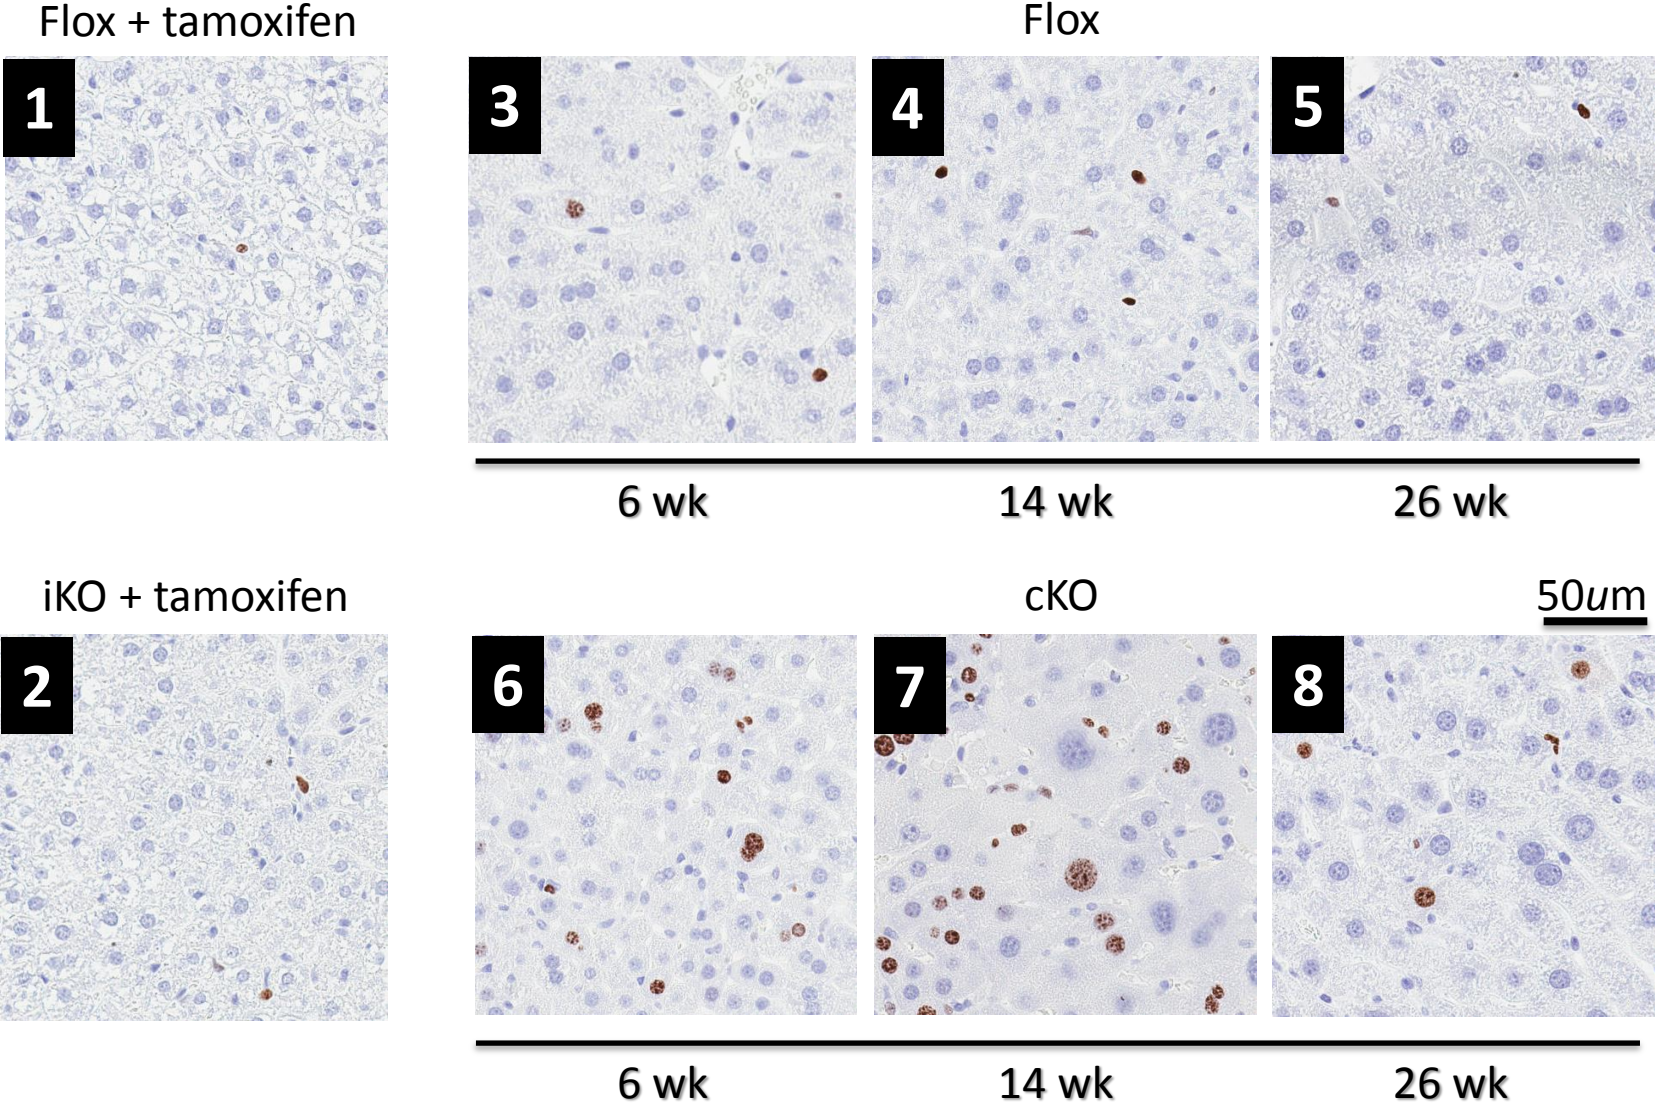

Figure S1D. Related to Figure 2 and 4

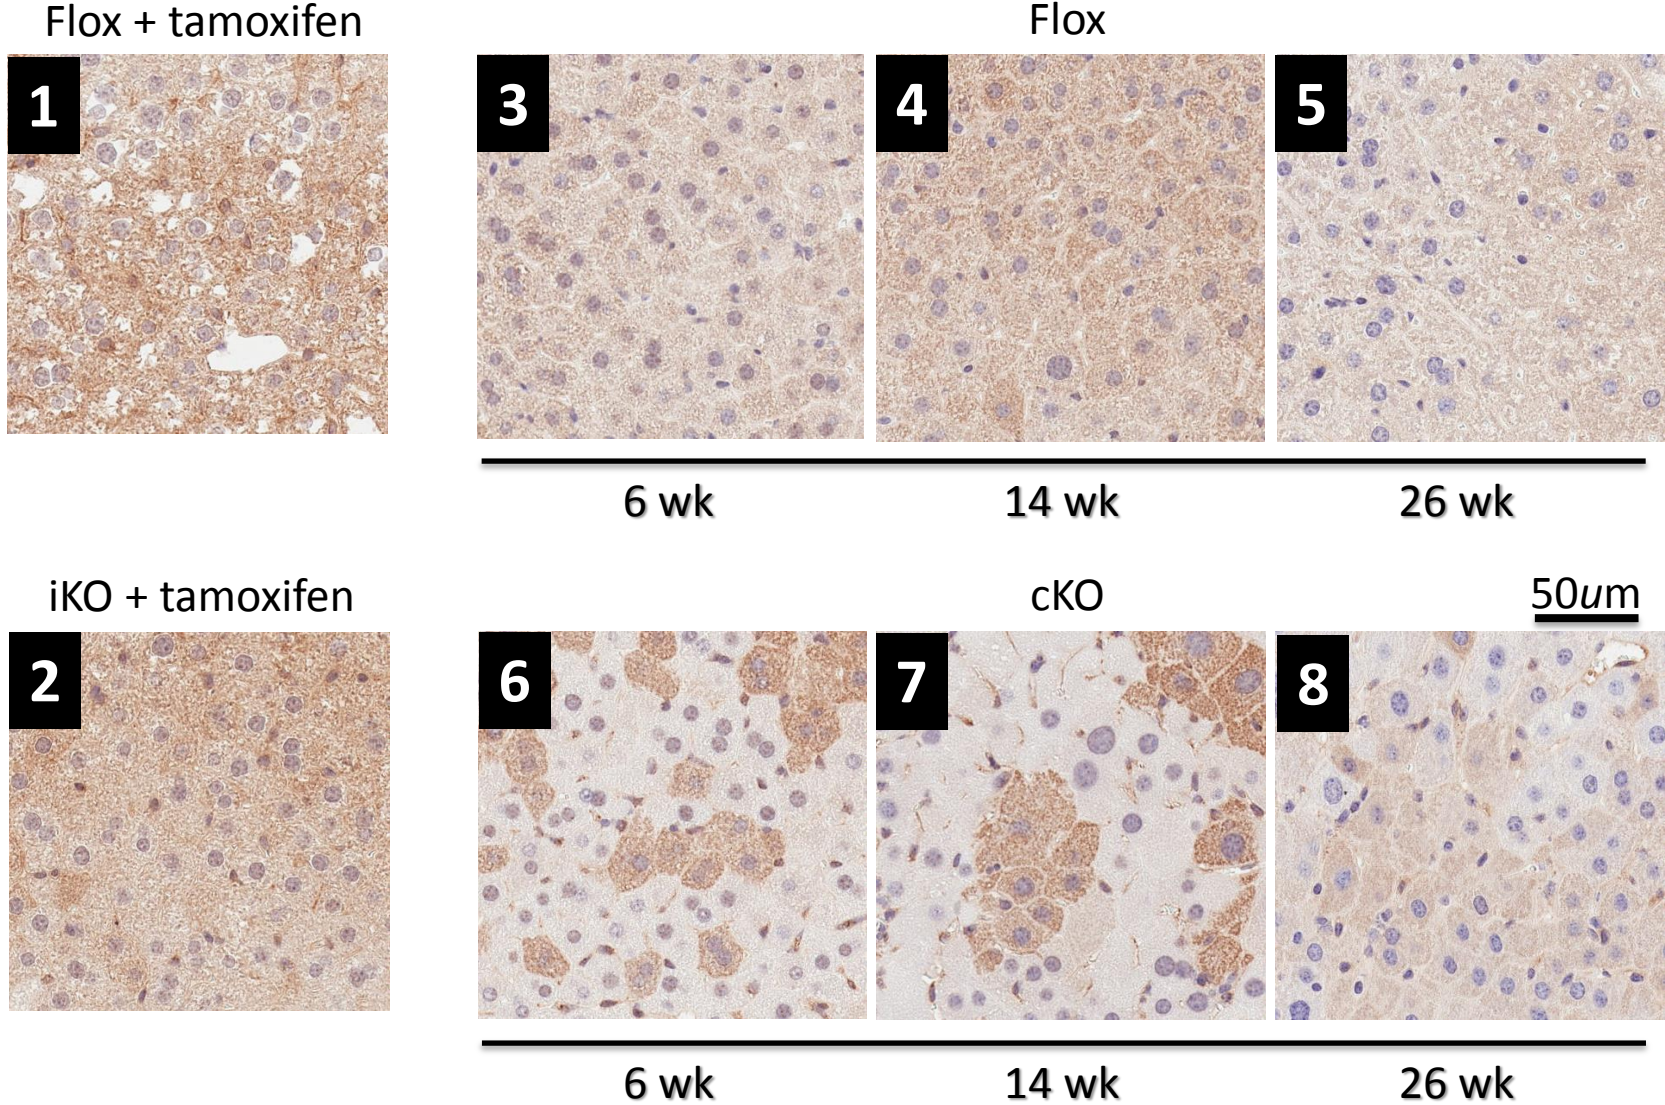



Figure S1E. Related to Figure 2 and 4

Flox + tamoxifen

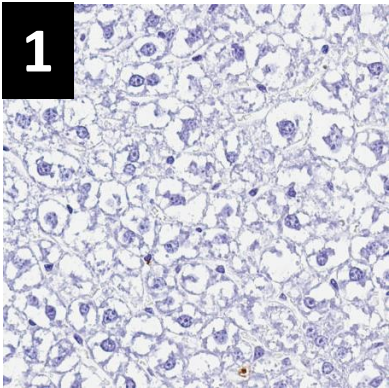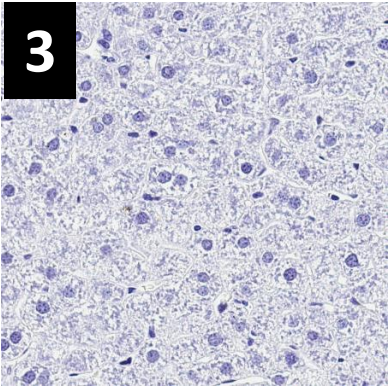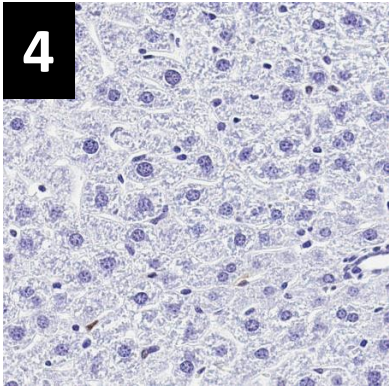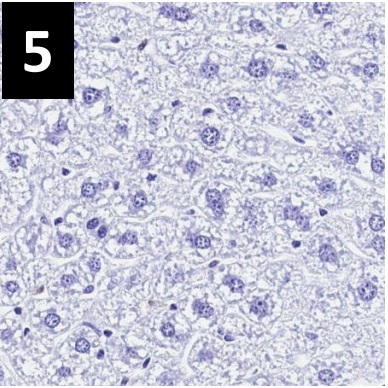

6 wk                      14 wk                      26 wk

iKO + tamoxifen

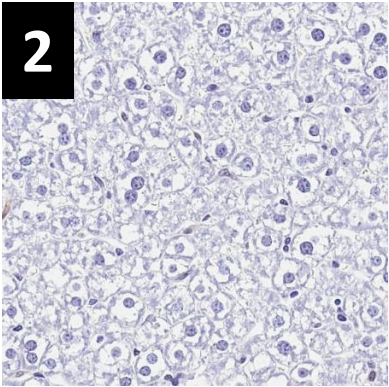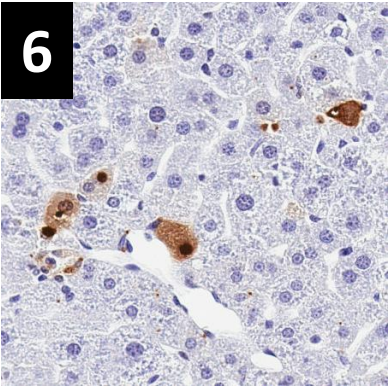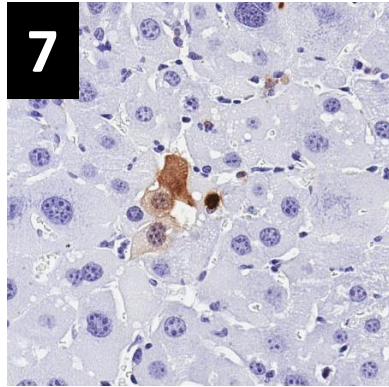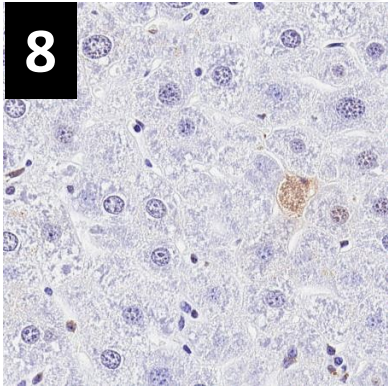

6 wk                      14 wk                      26 wk

Figure S1F. Related to Figure 2 and 4

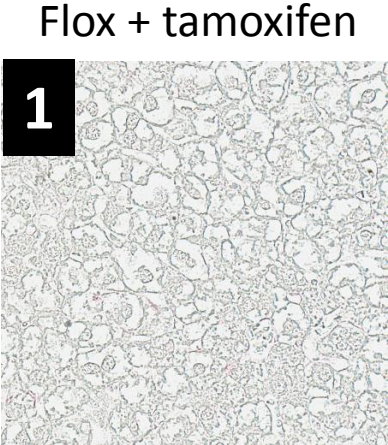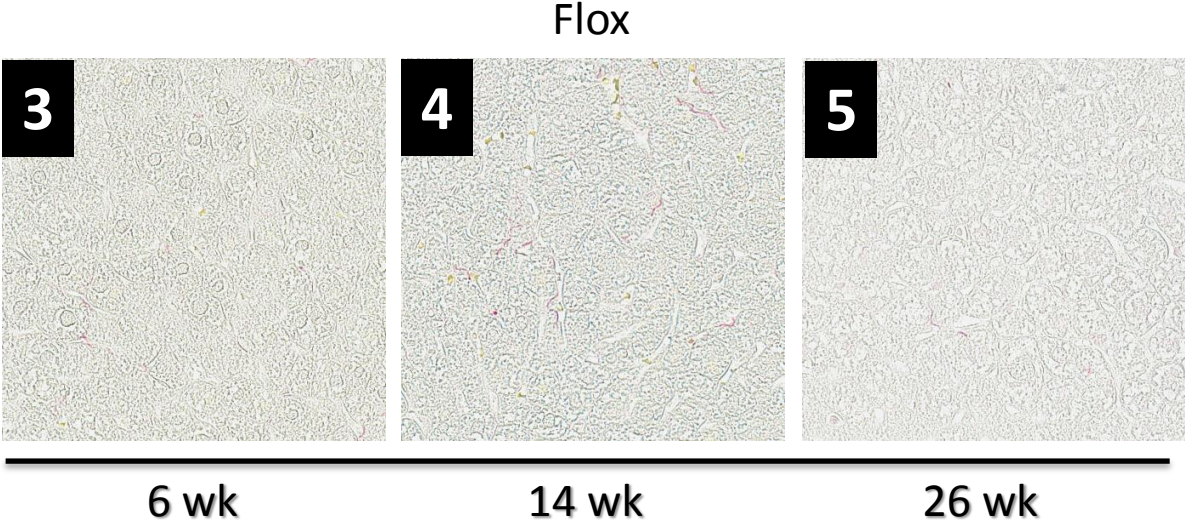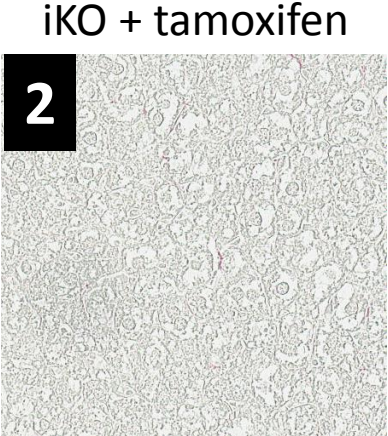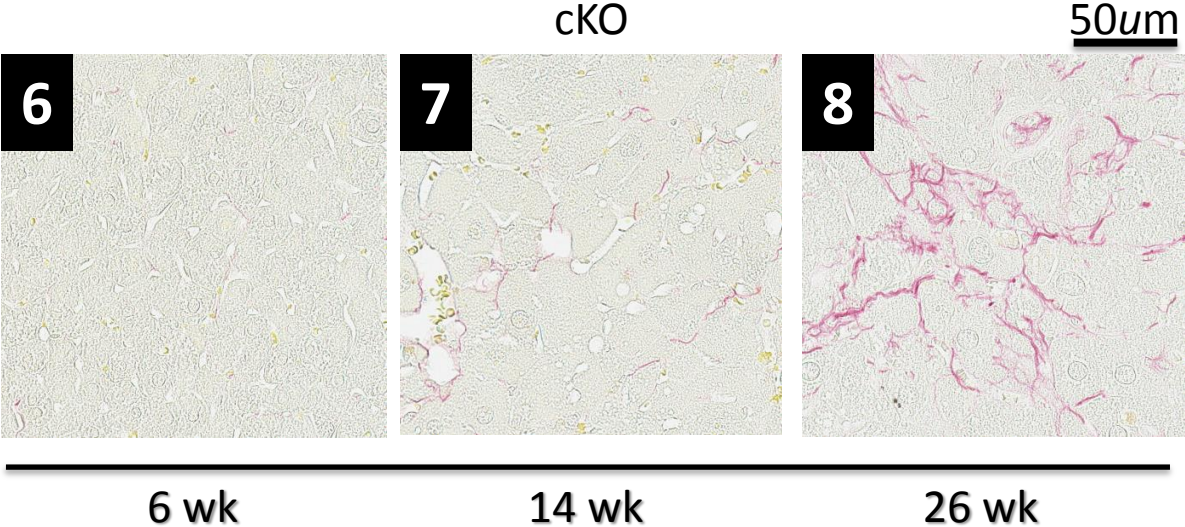

Supplement: supp_gkw350_nar-00491-y-2016-File010.pdf [file supp_gkw350_nar-00491-y-2016-File010.pdf]
